# Supplementary material for: Calotropin and corotoxigenin 3-O-glucopyranoside from the desert milkweed Asclepias subulata inhibit the Na+/K+-ATPase activity
Source: PeerJ journal article supplement (doi:10.7717/peerj.13524), 2022-06-02
Supplement: Table_S1.pdf [file Table_S1.pdf]

**Table SI. Kinetic analysis of Na<sup>+</sup>/K<sup>+</sup>-ATPase activity from the porcine cerebral cortex in the absence or presence of cardenolide ouabain at different concentrations.**

| Compound | Concentration<br>( $\mu\text{M}$ ) | $K_m$<br>(mM)      | $V_{max}$<br>( $\mu\text{molPi}/\text{mg}/\text{min}$ ) | $K_i$ ( $\mu\text{M}$ ) | Type of<br>inhibition |
|----------|------------------------------------|--------------------|---------------------------------------------------------|-------------------------|-----------------------|
| Ouabain  | 0.0                                | 0.88 $\pm$<br>0.09 | 3.8 $\pm$ 0.6                                           | 0.16 $\pm$ 0.04         | Uncompetitive         |
|          | 0.1                                | 0.47 $\pm$<br>0.06 | 2.11 $\pm$ 0.14                                         |                         |                       |
|          | 1.0                                | 0.12 $\pm$<br>0.01 | 0.66 $\pm$ 0.04                                         |                         |                       |

All values were obtained from triplicate independent assays. The data are expressed as mean  $\pm$  standard deviation. The values of  $K_m$  and  $V_{max}$  were calculated by data fitting Michaelis-Menten non-linear regression.  $K_m$  is expressed in mM.  $V_{max}$  is expressed as  $\mu\text{mol}$  of Pi released/mg of protein/min.
